# Supplementary material
Source: publisher figshare collection journal article supplement (https://acs.figshare.com/ndownloader/files/5699481)
Supplement: Supplementary file 1 [file 5699481]

# ic026191j.cif

#1. submission details

_publ_contact_author           # name and address of author for correspondence
;
        Dr. E. Cadot
        Institut Lavoisier, IREM, UMR CNRS C 8637
        Universit\'e de Versailles Saint-Quentin-en-Yvelines
        45 Avenue des Etats Unis
        78035 Versailles cedex
        France
;
_publ_contact_author_phone        '(33) 1 39 25 43 89'
_publ_contact_author_fax          '(33) 1 39 25 43 81'
_publ_contact_author_email        cadot@chimie.uvsq.fr

_publ_requested_journal           'Inorganic Chemistry'
_publ_requested_coeditor_name     ?

_publ_contact_letter
;
;

#==============================================================================

# 2. processing summary (iucr office use only)

_journal_date_recd_electronic     ?

_journal_date_to_coeditor         ?
_journal_date_from_coeditor       ?
_journal_date_accepted            ?

_journal_date_printers_first      ?
_journal_date_printers_final      ?
_journal_date_proofs_out          ?
_journal_date_proofs_in           ?

_journal_coeditor_name            ?
_journal_coeditor_code            ?
_journal_coeditor_notes
;
;

_journal_techeditor_code          ?
_journal_techeditor_notes
;
;

_journal_coden_astm               ?
_journal_name_full                ?
_journal_year                     ?
_journal_volume                   ?
_journal_issue                    ?
_journal_page_first               ?
_journal_page_last                ?

_journal_suppl_publ_number        ?
_journal_suppl_publ_pages         ?

#==============================================================================

# 3. title and author list

_publ_section_title
;
Monovacant Heteropolytungstate thio-derivatives. Synthesis and Characterization
of [(PW~11~O~39~)~2~(H~4~Mo~4~S~4~O~6~)]^10-^ and related isomers.
;

# the loop structure below should contain the names and addresses of all
# authors, in the required order of publication. repeat as necessary.

loop_
          _publ_author_name
          _publ_author_address
       'Marrot, Jerome'
;     Institut Lavoisier, IREM, UMR CNRS C 8637
        Universit\'e de Versailles Saint-Quentin-en-Yvelines
        45 Avenue des Etats Unis
        78035 Versailles cedex
        France
;
       'Secheresse, Francis'
;     Institut Lavoisier, IREM, UMR CNRS C 8637
        Universit\'e de Versailles Saint-Quentin-en-Yvelines
        45 Avenue des Etats Unis
        78035 Versailles cedex
        France
;
       'Cadot,Emmanuel'
;     Institut Lavoisier, IREM, UMR CNRS C 8637
        Universit\'e de Versailles Saint-Quentin-en-Yvelines
        45 Avenue des Etats Unis
        78035 Versailles cedex
        France
;

#==============================================================================

# 4. text

_publ_section_abstract
;

;
_publ_section_comment
;

;
_publ_section_experimental
;

;
_publ_section_references
;
sheldrick, g.m. (1993).  shelxl-93. program for crystal structure
determination.  univ. of g\"ottingen, federal republic of germany.

sheldrick, g.m. (1997).  shelxs-86. program for the solution of crystal
structures.  univ. of g\"ottingen, federal republic of germany.
;
_publ_section_figure_captions
;

;
_publ_section_acknowledgements
;

;
#====================================================================
data_ec25

_audit_creation_method            SHELXL-97
_chemical_name_systematic
;
   ?
;
_chemical_name_common             ?
_chemical_melting_point           ?
_chemical_formula_moiety          ?
_chemical_formula_sum
   'K10 Mo4 O109 P2 S4 W22'
_chemical_formula_weight          6753.64

loop_
   _atom_type_symbol
   _atom_type_description
   _atom_type_scat_dispersion_real
   _atom_type_scat_dispersion_imag
   _atom_type_scat_source
   'O'  'O'   0.0106   0.0060
   'International Tables Vol C Tables 4.2.6.8 and 6.1.1.4'
   'P'  'P'   0.1023   0.0942
   'International Tables Vol C Tables 4.2.6.8 and 6.1.1.4'
   'S'  'S'   0.1246   0.1234
   'International Tables Vol C Tables 4.2.6.8 and 6.1.1.4'
   'K'  'K'   0.2009   0.2494
   'International Tables Vol C Tables 4.2.6.8 and 6.1.1.4'
   'Mo'  'Mo'  -1.6832   0.6857
   'International Tables Vol C Tables 4.2.6.8 and 6.1.1.4'
   'W'  'W'  -0.8490   6.8722
   'International Tables Vol C Tables 4.2.6.8 and 6.1.1.4'

_symmetry_cell_setting            Triclinic
_symmetry_space_group_name_H-M    P-1

loop_
   _symmetry_equiv_pos_as_xyz
   'x, y, z'
   '-x, -y, -z'

_cell_length_a                    11.67640(10)
_cell_length_b                    13.5414(2)
_cell_length_c                    19.9173(3)
_cell_angle_alpha                 84.3020(10)
_cell_angle_beta                  81.5140(10)
_cell_angle_gamma                 64.4840(10)
_cell_volume                      2808.69(6)
_cell_formula_units_Z             1
_cell_measurement_temperature     296(2)
_cell_measurement_reflns_used     ?
_cell_measurement_theta_min       ?
_cell_measurement_theta_max       ?

_exptl_crystal_description        parallelepiped
_exptl_crystal_colour             brown
_exptl_crystal_size_max           0.40
_exptl_crystal_size_mid           0.40
_exptl_crystal_size_min           0.30
_exptl_crystal_density_meas       ?
_exptl_crystal_density_diffrn     3.993
_exptl_crystal_density_method     'not measured'
_exptl_crystal_F_000              2952
_exptl_absorpt_coefficient_mu     23.434
_exptl_absorpt_correction_type    multi-scan
_exptl_absorpt_correction_T_min   0.0384
_exptl_absorpt_correction_T_max   0.0538
_exptl_absorpt_process_details    'SADABS (Sheldrick, 1996)'

_exptl_special_details
;
   'Blessing, Acta Cryst. (1995) A51, 33-38'
;

_diffrn_ambient_temperature       296(2)
_diffrn_radiation_wavelength      0.71073
_diffrn_radiation_type            MoK\a
_diffrn_radiation_source          'fine-focus sealed tube'
_diffrn_radiation_monochromator   graphite
_diffrn_measurement_device_type   'CCD area detector'
_diffrn_measurement_method        'phi and omega scans'
_diffrn_detector_area_resol_mean  ?
_diffrn_standards_number          0
_diffrn_standards_interval_count  0
_diffrn_standards_interval_time   0
_diffrn_standards_decay_%         0
_diffrn_reflns_number             19197
_diffrn_reflns_av_R_equivalents   0.0531
_diffrn_reflns_av_sigmaI/netI     0.0935
_diffrn_reflns_limit_h_min        -15
_diffrn_reflns_limit_h_max        15
_diffrn_reflns_limit_k_min        -17
_diffrn_reflns_limit_k_max        10
_diffrn_reflns_limit_l_min        -25
_diffrn_reflns_limit_l_max        26
_diffrn_reflns_theta_min          1.03
_diffrn_reflns_theta_max          28.00
_reflns_number_total              13275
_reflns_number_gt                 9695
_reflns_threshold_expression      >2sigma(I)

_computing_data_collection        'Bruker SMART'
_computing_cell_refinement        'Bruker SMART'
_computing_data_reduction         'Bruker SHELXTL'
_computing_structure_solution     'SHELXS-97 (Sheldrick, 1990)'
_computing_structure_refinement   'SHELXL-97 (Sheldrick, 1997)'
_computing_molecular_graphics     'Bruker SHELXTL'
_computing_publication_material   'Bruker SHELXTL'

_refine_special_details
;
   Refinement of F^2^ against ALL reflections.  The weighted R-factor wR and
   goodness of fit S are based on F^2^, conventional R-factors R are based
   on F, with F set to zero for negative F^2^. The threshold expression of
   F^2^ > 2sigma(F^2^) is used only for calculating R-factors(gt) etc. and is
   not relevant to the choice of reflections for refinement.  R-factors based
   on F^2^ are statistically about twice as large as those based on F, and R-
   factors based on ALL data will be even larger.
;

_refine_ls_structure_factor_coef  Fsqd
_refine_ls_matrix_type            full
_refine_ls_weighting_scheme       calc
_refine_ls_weighting_details
   'calc w=1/[\s^2^(Fo^2^)+(0.0801P)^2^+0.0000P] where P=(Fo^2^+2Fc^2^)/3'
_atom_sites_solution_primary      direct
_atom_sites_solution_secondary    difmap
_atom_sites_solution_hydrogens    geom
_refine_ls_hydrogen_treatment     mixed
_refine_ls_extinction_method      SHELXL
_refine_ls_extinction_coef        0.00077(5)
_refine_ls_extinction_expression
   'Fc^*^=kFc[1+0.001xFc^2^\l^3^/sin(2\q)]^-1/4^'
_refine_ls_number_reflns          13275
_refine_ls_number_parameters      677
_refine_ls_number_restraints      0
_refine_ls_R_factor_all           0.0751
_refine_ls_R_factor_gt            0.0599
_refine_ls_wR_factor_ref          0.1604
_refine_ls_wR_factor_gt           0.1524
_refine_ls_goodness_of_fit_ref    0.969
_refine_ls_restrained_S_all       0.969
_refine_ls_shift/su_max           0.001
_refine_ls_shift/su_mean          0.000

loop_
   _atom_site_label
   _atom_site_type_symbol
   _atom_site_fract_x
   _atom_site_fract_y
   _atom_site_fract_z
   _atom_site_U_iso_or_equiv
   _atom_site_adp_type
   _atom_site_occupancy
   _atom_site_symmetry_multiplicity
   _atom_site_calc_flag
   _atom_site_refinement_flags
   _atom_site_disorder_assembly
   _atom_site_disorder_group
W1 W 0.36865(5) 0.68417(5) 0.10747(3) 0.04228(14) Uani 1 1 d . . .
W2 W 0.07490(6) 0.64091(5) 0.14050(3) 0.04437(15) Uani 1 1 d . . .
W3 W -0.12267(6) 0.97217(5) 0.26466(3) 0.04367(15) Uani 1 1 d . . .
W4 W 0.14657(6) 1.01344(4) 0.23491(3) 0.04187(14) Uani 1 1 d . . .
W5 W 0.46483(6) 0.77807(5) 0.23097(3) 0.04377(15) Uani 1 1 d . . .
W6 W -0.10021(6) 0.69063(5) 0.29555(3) 0.04755(16) Uani 1 1 d . . .
W7 W 0.19074(6) 0.47365(5) 0.28126(3) 0.04686(16) Uani 1 1 d . . .
W8 W 0.48272(6) 0.52002(5) 0.24894(3) 0.04493(15) Uani 1 1 d . . .
W9 W 0.28238(6) 0.58811(5) 0.41377(3) 0.04445(15) Uani 1 1 d . . .
W10 W -0.00720(6) 0.80819(5) 0.42297(3) 0.04504(15) Uani 1 1 d . . .
W11 W 0.26344(6) 0.84796(5) 0.39289(3) 0.04370(15) Uani 1 1 d . . .
Mo1A Mo 0.2066(5) 0.9807(5) 0.0464(3) 0.0420(10) Uani 0.50 1 d P . .
Mo2A Mo -0.1436(4) 0.9264(4) 0.0839(3) 0.0411(9) Uani 0.50 1 d P . .
Mo1B Mo 0.1674(5) 0.9735(5) 0.0487(3) 0.0404(10) Uani 0.50 1 d P . .
Mo2B Mo -0.1052(4) 0.9369(4) 0.0794(3) 0.0382(8) Uani 0.50 1 d P . .
P P 0.1743(3) 0.7470(3) 0.26343(17) 0.0352(7) Uani 1 1 d . . .
S1 S 0.0809(4) 1.1574(3) 0.0161(2) 0.0511(9) Uani 1 1 d . . .
S2 S 0.2507(4) 0.8902(3) -0.0526(2) 0.0524(9) Uani 1 1 d . . .
O1 O 0.4430(11) 0.6461(10) 0.0278(6) 0.062(3) Uani 1 1 d . . .
O2 O 0.0485(12) 0.5894(9) 0.0728(6) 0.062(3) Uani 1 1 d . . .
O3 O -0.2706(10) 1.0629(10) 0.2955(7) 0.066(3) Uani 1 1 d . . .
O4 O 0.1554(11) 1.1341(8) 0.2478(6) 0.055(3) Uani 1 1 d . . .
O5 O 0.5842(11) 0.8192(10) 0.2245(6) 0.057(3) Uani 1 1 d . . .
O6 O -0.2408(11) 0.6855(10) 0.3211(7) 0.065(3) Uani 1 1 d . . .
O7 O 0.2272(12) 0.3377(8) 0.2963(6) 0.058(3) Uani 1 1 d . . .
O8 O 0.6132(11) 0.4011(9) 0.2553(6) 0.059(3) Uani 1 1 d . . .
O9 O 0.3496(11) 0.4915(9) 0.4743(6) 0.058(3) Uani 1 1 d . . .
O10 O -0.1227(11) 0.8494(10) 0.4888(6) 0.060(3) Uani 1 1 d . . .
O11 O 0.3149(11) 0.9155(10) 0.4407(6) 0.057(3) Uani 1 1 d . . .
O12 O 0.2576(10) 0.8204(8) 0.0940(6) 0.050(2) Uani 1 1 d . . .
O13 O 0.2449(10) 0.6250(8) 0.1179(5) 0.046(2) Uani 1 1 d . . .
O14 O 0.4775(9) 0.7372(8) 0.1418(5) 0.044(2) Uani 1 1 d . . .
O15 O 0.4820(10) 0.5436(8) 0.1561(6) 0.048(2) Uani 1 1 d . . .
O16 O 0.3117(9) 0.7021(8) 0.2290(5) 0.043(2) Uani 1 1 d . . .
O17 O 0.0037(10) 0.7838(8) 0.1212(5) 0.048(2) Uani 1 1 d . . .
O18 O -0.0731(10) 0.6542(8) 0.2036(5) 0.047(2) Uani 1 1 d . . .
O19 O 0.1112(9) 0.6731(7) 0.2496(5) 0.041(2) Uani 1 1 d . . .
O20 O 0.1530(10) 0.4953(8) 0.1925(6) 0.049(2) Uani 1 1 d . . .
O21 O -0.1343(10) 0.9835(8) 0.1763(6) 0.050(2) Uani 1 1 d . . .
O22 O 0.0965(9) 0.8643(7) 0.2373(5) 0.045(2) Uani 1 1 d . . .
O23 O -0.0300(10) 1.0591(8) 0.2646(5) 0.047(2) Uani 1 1 d . . .
O24 O -0.0679(9) 0.9158(8) 0.3589(5) 0.047(2) Uani 1 1 d . . .
O25 O -0.1435(9) 0.8382(8) 0.2708(5) 0.044(2) Uani 1 1 d . . .
O26 O 0.1356(10) 1.0254(8) 0.1472(5) 0.047(2) Uani 1 1 d . . .
O27 O 0.3222(9) 0.9092(8) 0.2183(5) 0.044(2) Uani 1 1 d . . .
O28 O 0.1815(10) 0.9530(8) 0.3299(5) 0.044(2) Uani 1 1 d . . .
O29 O 0.5529(9) 0.6240(8) 0.2511(5) 0.044(2) Uani 1 1 d . . .
O30 O 0.4049(10) 0.7898(8) 0.3268(5) 0.047(2) Uani 1 1 d . . .
O31 O 0.0141(10) 0.5394(8) 0.3125(6) 0.051(2) Uani 1 1 d . . .
O32 O -0.0571(10) 0.7183(9) 0.3770(6) 0.052(3) Uani 1 1 d . . .
O33 O 0.3530(9) 0.4711(8) 0.2517(6) 0.049(2) Uani 1 1 d . . .
O34 O 0.2128(10) 0.5187(8) 0.3654(5) 0.048(2) Uani 1 1 d . . .
O35 O 0.4168(9) 0.5512(8) 0.3439(5) 0.046(2) Uani 1 1 d . . .
O36 O 0.1777(9) 0.7426(8) 0.3407(5) 0.040(2) Uani 1 1 d . . .
O37 O 0.1170(10) 0.6688(8) 0.4602(5) 0.046(2) Uani 1 1 d . . .
O38 O 0.3280(10) 0.7013(8) 0.4345(5) 0.045(2) Uani 1 1 d . . .
O39 O 0.1028(9) 0.8698(8) 0.4451(5) 0.046(2) Uani 1 1 d . . .
O40 O 0.0302(10) 0.9557(8) 0.0646(5) 0.047(2) Uani 1 1 d . . .
O41 O 0.3492(10) 0.9795(11) 0.0536(7) 0.069(4) Uani 1 1 d . . .
O42 O -0.2618(12) 0.8895(10) 0.1187(7) 0.062(3) Uani 1 1 d . . .
K1 K -0.3871(5) 0.5897(5) 0.3947(3) 0.0826(13) Uani 1 1 d . . .
K2 K -0.1542(6) 1.2758(4) 0.2991(3) 0.102(2) Uani 1 1 d . . .
K3 K 0.1941(7) 1.1642(5) 0.3768(3) 0.0958(17) Uani 1 1 d . . .
K4 K -0.453(2) 1.2227(11) 0.2190(13) 0.183(10) Uani 0.50 1 d P . .
K5 K -0.0602(11) 0.4178(8) 0.0714(5) 0.082(3) Uani 0.50 1 d P . .
K6 K 0.3482(18) 0.9448(14) 0.5686(7) 0.141(6) Uani 0.50 1 d P . .
K7 K -0.2999(17) 0.4019(14) 0.0704(9) 0.142(6) Uani 0.50 1 d P . .
O1W O -0.0593(17) 1.1261(13) 0.4070(9) 0.094(5) Uiso 1 1 d . . .
O2W O -0.1492(17) 1.2399(14) 0.1602(10) 0.101(5) Uiso 1 1 d . . .
O3W O -0.3494(19) 1.3599(15) 0.4103(11) 0.110(6) Uiso 1 1 d . . .
O4W O 0.588(2) 0.6378(16) 0.8990(11) 0.118(6) Uiso 1 1 d . . .
O5W O -0.505(2) 1.2610(19) 0.3632(13) 0.141(8) Uiso 1 1 d . . .
O6W O 0.582(5) 0.928(4) 0.700(3) 0.138(17) Uiso 0.50 1 d P . .
O7W O -0.476(5) 1.055(4) 0.192(3) 0.143(15) Uiso 0.50 1 d P . .
O8W O -0.068(3) 1.376(2) 0.3940(16) 0.166(10) Uiso 1 1 d . . .
O9W O 0.557(8) 0.970(6) 0.666(4) 0.21(3) Uiso 0.50 1 d P . .
O10W O 0.248(4) 1.296(3) 0.449(2) 0.114(12) Uiso 0.50 1 d P . .
O11W O 0.374(4) 0.186(3) -0.045(2) 0.104(10) Uiso 0.50 1 d P . .
O12W O 0.173(3) 0.293(2) 0.1464(14) 0.150(8) Uiso 1 1 d . . .
O13W O -0.166(3) 0.483(3) 0.2088(18) 0.093(9) Uiso 0.50 1 d P . .
O14W O 0.437(6) 1.227(5) 0.527(3) 0.19(2) Uiso 0.50 1 d P . .
O15W O 0.262(6) 0.312(5) -0.094(3) 0.18(2) Uiso 0.50 1 d P . .
O16W O -0.175(3) 0.604(3) -0.0010(19) 0.096(9) Uiso 0.50 1 d P . .
O17W O -0.607(5) 1.155(4) 0.074(3) 0.161(19) Uiso 0.50 1 d P . .
O18W O 0.029(7) 1.461(5) 0.527(4) 0.20(3) Uiso 0.50 1 d P . .

loop_
   _atom_site_aniso_label
   _atom_site_aniso_U_11
   _atom_site_aniso_U_22
   _atom_site_aniso_U_33
   _atom_site_aniso_U_23
   _atom_site_aniso_U_13
   _atom_site_aniso_U_12
W1 0.0442(3) 0.0517(3) 0.0296(3) -0.0025(2) -0.0043(2) -0.0189(2)
W2 0.0512(3) 0.0517(3) 0.0353(3) -0.0013(2) -0.0109(3) -0.0247(2)
W3 0.0451(3) 0.0535(3) 0.0292(3) -0.0032(2) -0.0048(2) -0.0173(2)
W4 0.0538(3) 0.0476(3) 0.0276(3) -0.0019(2) -0.0077(2) -0.0237(2)
W5 0.0435(3) 0.0596(3) 0.0332(3) 0.0003(2) -0.0058(2) -0.0264(3)
W6 0.0463(3) 0.0620(3) 0.0412(4) 0.0007(3) -0.0063(3) -0.0295(3)
W7 0.0539(3) 0.0500(3) 0.0415(4) 0.0022(2) -0.0100(3) -0.0260(3)
W8 0.0431(3) 0.0522(3) 0.0358(3) 0.0006(2) -0.0066(2) -0.0166(2)
W9 0.0489(3) 0.0553(3) 0.0307(3) 0.0040(2) -0.0082(2) -0.0236(3)
W10 0.0472(3) 0.0607(3) 0.0266(3) -0.0007(2) -0.0017(2) -0.0233(3)
W11 0.0525(3) 0.0572(3) 0.0270(3) -0.0009(2) -0.0085(2) -0.0275(3)
Mo1A 0.049(3) 0.0497(16) 0.0290(16) 0.0010(11) -0.006(2) -0.0226(19)
Mo2A 0.043(2) 0.0533(17) 0.0297(16) 0.0009(11) -0.0070(17) -0.0230(16)
Mo1B 0.046(3) 0.0488(17) 0.0263(15) 0.0003(11) -0.0063(19) -0.0201(18)
Mo2B 0.039(2) 0.0490(16) 0.0293(16) -0.0006(11) -0.0064(16) -0.0204(15)
P 0.0412(17) 0.0415(16) 0.0252(17) 0.0001(12) -0.0043(13) -0.0199(13)
S1 0.070(2) 0.0516(19) 0.033(2) -0.0026(14) -0.0113(17) -0.0247(17)
S2 0.058(2) 0.055(2) 0.033(2) -0.0056(15) -0.0074(17) -0.0133(16)
O1 0.056(6) 0.095(8) 0.030(6) -0.026(5) 0.004(5) -0.024(6)
O2 0.079(8) 0.068(7) 0.046(7) -0.011(5) -0.015(6) -0.032(6)
O3 0.040(5) 0.079(8) 0.058(8) -0.022(6) 0.000(5) -0.004(5)
O4 0.075(7) 0.058(6) 0.049(7) -0.005(5) -0.010(6) -0.041(6)
O5 0.060(6) 0.088(8) 0.037(6) 0.009(5) -0.015(5) -0.044(6)
O6 0.050(6) 0.072(7) 0.074(9) 0.004(6) -0.014(6) -0.027(5)
O7 0.078(8) 0.052(6) 0.055(7) 0.009(5) -0.018(6) -0.038(6)
O8 0.053(6) 0.058(6) 0.054(8) 0.000(5) -0.010(5) -0.011(5)
O9 0.056(6) 0.060(6) 0.054(8) 0.006(5) -0.014(5) -0.018(5)
O10 0.062(7) 0.084(8) 0.037(7) -0.001(5) -0.002(5) -0.036(6)
O11 0.070(7) 0.082(7) 0.040(7) -0.008(5) -0.009(5) -0.048(6)
O12 0.052(6) 0.048(5) 0.042(6) 0.000(4) -0.014(5) -0.010(4)
O13 0.049(5) 0.049(5) 0.044(6) -0.005(4) -0.005(5) -0.024(4)
O14 0.045(5) 0.058(5) 0.031(5) -0.006(4) -0.002(4) -0.024(4)
O15 0.047(5) 0.049(5) 0.043(6) -0.002(4) -0.002(5) -0.015(4)
O16 0.037(5) 0.055(5) 0.034(6) -0.008(4) -0.011(4) -0.012(4)
O17 0.051(5) 0.052(5) 0.043(6) 0.007(4) -0.014(5) -0.024(4)
O18 0.049(5) 0.063(6) 0.038(6) -0.006(4) -0.012(5) -0.028(5)
O19 0.039(5) 0.050(5) 0.045(6) -0.002(4) -0.011(4) -0.026(4)
O20 0.054(6) 0.049(5) 0.046(7) 0.000(4) -0.004(5) -0.026(5)
O21 0.054(6) 0.053(5) 0.043(6) 0.002(4) -0.013(5) -0.022(5)
O22 0.047(5) 0.045(5) 0.038(6) -0.003(4) -0.008(4) -0.013(4)
O23 0.052(6) 0.051(5) 0.042(6) -0.007(4) -0.008(5) -0.024(4)
O24 0.044(5) 0.057(6) 0.037(6) -0.003(4) -0.008(4) -0.018(4)
O25 0.045(5) 0.053(5) 0.036(6) 0.001(4) -0.007(4) -0.021(4)
O26 0.059(6) 0.055(5) 0.034(6) -0.003(4) -0.008(5) -0.030(5)
O27 0.046(5) 0.056(5) 0.033(6) 0.002(4) -0.009(4) -0.025(4)
O28 0.056(6) 0.052(5) 0.028(5) 0.000(4) -0.005(4) -0.026(4)
O29 0.040(5) 0.060(6) 0.036(6) 0.003(4) -0.006(4) -0.024(4)
O30 0.053(6) 0.066(6) 0.025(5) 0.007(4) -0.011(4) -0.030(5)
O31 0.054(6) 0.053(6) 0.052(7) 0.006(5) -0.014(5) -0.029(5)
O32 0.043(5) 0.071(6) 0.051(7) -0.012(5) -0.004(5) -0.031(5)
O33 0.041(5) 0.055(6) 0.053(7) 0.000(4) -0.007(5) -0.023(4)
O34 0.051(6) 0.066(6) 0.029(6) 0.006(4) -0.008(4) -0.028(5)
O35 0.043(5) 0.063(6) 0.034(6) -0.005(4) -0.007(4) -0.022(4)
O36 0.042(5) 0.058(5) 0.023(5) 0.001(4) -0.005(4) -0.024(4)
O37 0.055(6) 0.065(6) 0.019(5) 0.003(4) -0.001(4) -0.029(5)
O38 0.054(5) 0.059(6) 0.026(5) 0.007(4) -0.005(4) -0.029(5)
O39 0.049(5) 0.068(6) 0.024(5) -0.007(4) -0.003(4) -0.027(5)
O40 0.057(6) 0.057(6) 0.026(5) -0.004(4) -0.007(4) -0.021(5)
O41 0.036(5) 0.100(9) 0.068(9) -0.026(7) -0.003(5) -0.022(6)
O42 0.060(7) 0.079(8) 0.060(8) 0.004(6) 0.002(6) -0.044(6)
K1 0.086(3) 0.126(4) 0.057(3) 0.020(2) -0.019(2) -0.067(3)
K2 0.097(4) 0.088(3) 0.085(4) -0.028(3) -0.035(3) 0.008(3)
K3 0.154(5) 0.110(4) 0.047(3) -0.003(2) -0.005(3) -0.080(4)
K4 0.185(17) 0.080(8) 0.27(3) -0.039(11) -0.115(18) -0.007(9)
K5 0.111(7) 0.084(6) 0.057(6) -0.018(4) -0.013(5) -0.041(5)
K6 0.153(13) 0.171(13) 0.065(9) -0.006(8) -0.019(9) -0.035(11)
K7 0.137(13) 0.145(12) 0.123(14) -0.025(9) -0.037(11) -0.029(10)

_geom_special_details
;
   All esds (except the esd in the dihedral angle between two l.s. planes)
   are estimated using the full covariance matrix.  The cell esds are taken
   into account individually in the estimation of esds in distances, angles
   and torsion angles; correlations between esds in cell parameters are only
   used when they are defined by crystal symmetry.  An approximate (isotropic)
   treatment of cell esds is used for estimating esds involving l.s. planes.
;

loop_
   _geom_bond_atom_site_label_1
   _geom_bond_atom_site_label_2
   _geom_bond_distance
   _geom_bond_site_symmetry_2
   _geom_bond_publ_flag
W1 O1 1.705(11) . ?
W1 O12 1.761(9) . ?
W1 O13 1.911(10) . ?
W1 O14 1.933(9) . ?
W1 O15 2.038(10) . ?
W1 O16 2.421(10) . ?
W1 K7 4.125(16) 2_565 ?
W1 K7 4.136(16) 1_655 ?
W2 O2 1.701(10) . ?
W2 O17 1.773(10) . ?
W2 O13 1.891(10) . ?
W2 O18 1.932(11) . ?
W2 O20 2.028(10) . ?
W2 O19 2.390(9) . ?
W3 O3 1.697(10) . ?
W3 O21 1.772(11) . ?
W3 O23 1.912(10) . ?
W3 O25 1.921(10) . ?
W3 O24 2.041(10) . ?
W3 O22 2.347(10) . ?
W3 K6 3.852(17) 2_576 ?
W3 K4 4.047(15) . ?
W3 K2 4.086(6) . ?
W4 O4 1.727(9) . ?
W4 O26 1.756(10) . ?
W4 O23 1.897(10) . ?
W4 O27 1.925(10) . ?
W4 O28 2.013(10) . ?
W4 O22 2.326(10) . ?
W4 K3 3.879(5) . ?
W4 K2 3.926(5) . ?
W5 O5 1.695(11) . ?
W5 O27 1.865(9) . ?
W5 O14 1.879(9) . ?
W5 O29 1.918(10) . ?
W5 O30 1.931(10) . ?
W5 O16 2.423(10) . ?
W5 K1 4.042(5) 1_655 ?
W6 O6 1.674(12) . ?
W6 O25 1.871(10) . ?
W6 O32 1.884(10) . ?
W6 O18 1.891(10) . ?
W6 O31 1.931(10) . ?
W6 O19 2.421(9) . ?
W7 O7 1.706(10) . ?
W7 O20 1.850(11) . ?
W7 O33 1.886(10) . ?
W7 O31 1.893(11) . ?
W7 O34 1.928(10) . ?
W7 O19 2.495(9) . ?
W8 O8 1.683(10) . ?
W8 O15 1.847(11) . ?
W8 O33 1.889(10) . ?
W8 O29 1.916(10) . ?
W8 O35 1.949(10) . ?
W8 O16 2.454(9) . ?
W8 K1 3.836(5) 1_655 ?
W8 K4 3.857(14) 1_645 ?
W8 K7 4.076(18) 1_655 ?
W9 O9 1.692(11) . ?
W9 O35 1.861(11) . ?
W9 O34 1.881(10) . ?
W9 O37 1.906(10) . ?
W9 O38 1.923(10) . ?
W9 O36 2.389(9) . ?
W9 K1 3.831(5) 1_655 ?
W10 O10 1.680(12) . ?
W10 O24 1.806(10) . ?
W10 O32 1.910(10) . ?
W10 O39 1.924(10) . ?
W10 O37 1.974(10) . ?
W10 O36 2.394(10) . ?
W10 K6 3.938(17) 2_576 ?
W11 O11 1.708(10) . ?
W11 O28 1.827(9) . ?
W11 O30 1.877(11) . ?
W11 O39 1.923(10) . ?
W11 O38 1.941(9) . ?
W11 O36 2.440(9) . ?
W11 K3 3.990(5) . ?
W11 K1 4.075(6) 1_655 ?
Mo1A Mo1B 0.502(5) . ?
Mo1A O41 1.685(12) . ?
Mo1A O26 2.098(12) . ?
Mo1A O12 2.146(12) . ?
Mo1A O40 2.201(12) . ?
Mo1A S1 2.279(7) . ?
Mo1A S2 2.301(8) . ?
Mo1A Mo2A 2.826(8) 2_575 ?
Mo1A Mo2B 2.847(8) 2_575 ?
Mo2A Mo2B 0.519(4) . ?
Mo2A O42 1.696(12) . ?
Mo2A O21 2.100(12) . ?
Mo2A O17 2.114(11) . ?
Mo2A O40 2.204(12) . ?
Mo2A S1 2.257(7) 2_575 ?
Mo2A S2 2.317(6) 2_575 ?
Mo2A Mo1A 2.826(8) 2_575 ?
Mo2A Mo1B 2.842(8) 2_575 ?
Mo1B O40 1.701(12) . ?
Mo1B O12 2.061(11) . ?
Mo1B O26 2.077(12) . ?
Mo1B O41 2.175(12) . ?
Mo1B S2 2.285(7) . ?
Mo1B S1 2.312(7) . ?
Mo1B Mo2B 2.771(8) 2_575 ?
Mo1B Mo2A 2.842(8) 2_575 ?
Mo2B O40 1.687(12) . ?
Mo2B O21 2.026(12) . ?
Mo2B O17 2.076(11) . ?
Mo2B O42 2.204(12) . ?
Mo2B S2 2.290(6) 2_575 ?
Mo2B S1 2.310(6) 2_575 ?
Mo2B Mo1B 2.771(8) 2_575 ?
Mo2B Mo1A 2.847(8) 2_575 ?
P O16 1.528(10) . ?
P O22 1.533(10) . ?
P O36 1.539(10) . ?
P O19 1.540(9) . ?
S1 Mo2A 2.257(7) 2_575 ?
S1 Mo2B 2.310(6) 2_575 ?
S1 K5 3.405(10) 1_565 ?
S2 Mo2B 2.290(6) 2_575 ?
S2 Mo2A 2.317(6) 2_575 ?
S2 K7 3.789(19) 2_565 ?
O1 K7 3.031(19) 2_565 ?
O2 K5 2.864(15) 2_565 ?
O2 K5 3.094(15) . ?
O3 K6 2.73(2) 2_576 ?
O3 K4 2.81(2) . ?
O4 K3 2.771(12) . ?
O4 K2 3.334(14) . ?
O6 K1 2.746(14) . ?
O7 K3 2.844(12) 1_545 ?
O8 K2 2.730(12) 1_645 ?
O8 K4 3.02(2) 1_645 ?
O9 K1 2.750(13) 2_566 ?
O10 K3 2.697(13) 2_576 ?
O10 K6 3.15(2) 2_576 ?
O11 K6 2.725(18) . ?
O11 K3 3.246(13) . ?
O15 K7 2.87(2) 1_655 ?
O23 K2 2.761(11) . ?
O24 K6 3.19(2) 2_576 ?
O28 K3 3.164(11) . ?
O29 K1 2.988(11) 1_655 ?
O30 K1 3.104(11) 1_655 ?
O33 K4 3.209(17) 1_645 ?
O35 K1 2.891(10) 1_655 ?
O38 K1 3.018(12) 1_655 ?
K1 O9 2.750(13) 2_566 ?
K1 O14W 2.86(6) 2_576 ?
K1 O35 2.891(10) 1_455 ?
K1 O3W 2.940(19) 1_545 ?
K1 O29 2.988(11) 1_455 ?
K1 O38 3.018(12) 1_455 ?
K1 O30 3.104(11) 1_455 ?
K1 W9 3.831(5) 1_455 ?
K1 W8 3.836(5) 1_455 ?
K1 W5 4.042(5) 1_455 ?
K1 W11 4.075(6) 1_455 ?
K2 O8 2.730(12) 1_465 ?
K2 O1W 2.804(19) . ?
K2 O2W 2.84(2) . ?
K2 O3W 2.86(2) . ?
K2 O8W 2.95(3) . ?
K2 O13W 3.14(3) 1_565 ?
K2 K3 4.161(9) . ?
K2 K1 4.383(8) 1_565 ?
K3 O6W 2.67(6) 2_676 ?
K3 O10 2.697(13) 2_576 ?
K3 O10W 2.71(4) . ?
K3 O9W 2.74(8) 2_676 ?
K3 O7 2.844(12) 1_565 ?
K3 O8W 3.17(3) . ?
K3 O1W 3.179(19) . ?
K4 O7W 2.51(5) . ?
K4 O5W 2.90(4) . ?
K4 O8 3.02(2) 1_465 ?
K4 O4W 3.03(3) 2_576 ?
K4 O6W 3.20(6) 2_576 ?
K4 O33 3.209(17) 1_465 ?
K4 W8 3.857(14) 1_465 ?
K4 K7 4.32(3) 1_565 ?
K4 K6 4.67(3) 2_576 ?
K5 O16W 2.68(3) . ?
K5 O16W 2.80(4) 2_565 ?
K5 O2 2.864(15) 2_565 ?
K5 O13W 2.89(4) . ?
K5 K7 2.90(2) . ?
K5 O12W 3.04(3) . ?
K5 O2W 3.28(2) 1_545 ?
K5 S1 3.405(10) 1_545 ?
K5 O15W 3.42(6) 2_565 ?
K5 K5 3.91(2) 2_565 ?
K5 K2 4.908(13) 1_545 ?
K6 O3 2.73(2) 2_576 ?
K6 O5W 2.92(3) 2_576 ?
K6 O14W 3.12(7) 2_676 ?
K6 O10 3.15(2) 2_576 ?
K6 O24 3.19(2) 2_576 ?
K6 W3 3.852(17) 2_576 ?
K6 W10 3.938(17) 2_576 ?
K6 K4 4.67(3) 2_576 ?
K6 K6 4.81(4) 2_676 ?
K6 K2 4.85(2) 2_576 ?
K7 O2W 2.82(2) 1_545 ?
K7 O15 2.87(2) 1_455 ?
K7 O1 3.031(19) 2_565 ?
K7 S2 3.789(19) 2_565 ?
K7 W8 4.076(18) 1_455 ?
K7 W1 4.125(16) 2_565 ?
K7 W1 4.136(16) 1_455 ?
K7 K4 4.32(3) 1_545 ?
K7 K2 4.980(18) 1_545 ?
O2W K7 2.82(2) 1_565 ?
O2W K5 3.28(2) 1_565 ?
O3W K1 2.940(19) 1_565 ?
O4W K4 3.03(3) 2_576 ?
O5W K6 2.92(3) 2_576 ?
O6W O9W 0.84(9) . ?
O6W K3 2.67(6) 2_676 ?
O6W K4 3.20(6) 2_576 ?
O9W K3 2.74(8) 2_676 ?
O13W K2 3.14(3) 1_545 ?
O14W K1 2.86(6) 2_576 ?
O14W K6 3.12(7) 2_676 ?
O15W K5 3.42(6) 2_565 ?
O16W K5 2.80(4) 2_565 ?
O18W O18W 1.46(12) 2_586 ?

loop_
   _geom_angle_atom_site_label_1
   _geom_angle_atom_site_label_2
   _geom_angle_atom_site_label_3
   _geom_angle
   _geom_angle_site_symmetry_1
   _geom_angle_site_symmetry_3
   _geom_angle_publ_flag
O1 W1 O12 103.1(6) . . ?
O1 W1 O13 101.8(5) . . ?
O12 W1 O13 94.8(5) . . ?
O1 W1 O14 102.7(5) . . ?
O12 W1 O14 89.5(4) . . ?
O13 W1 O14 153.4(4) . . ?
O1 W1 O15 95.7(5) . . ?
O12 W1 O15 160.5(5) . . ?
O13 W1 O15 86.2(4) . . ?
O14 W1 O15 81.3(4) . . ?
O1 W1 O16 165.7(5) . . ?
O12 W1 O16 90.1(4) . . ?
O13 W1 O16 82.3(4) . . ?
O14 W1 O16 71.5(4) . . ?
O15 W1 O16 70.7(4) . . ?
O1 W1 K7 40.3(5) . 2_565 ?
O12 W1 K7 90.4(4) . 2_565 ?
O13 W1 K7 64.9(4) . 2_565 ?
O14 W1 K7 141.5(4) . 2_565 ?
O15 W1 K7 107.5(4) . 2_565 ?
O16 W1 K7 147.0(4) . 2_565 ?
O1 W1 K7 56.9(5) . 1_655 ?
O12 W1 K7 157.0(5) . 1_655 ?
O13 W1 K7 100.1(4) . 1_655 ?
O14 W1 K7 84.9(4) . 1_655 ?
O15 W1 K7 39.4(4) . 1_655 ?
O16 W1 K7 109.1(3) . 1_655 ?
K7 W1 K7 80.4(3) 2_565 1_655 ?
O2 W2 O17 102.1(5) . . ?
O2 W2 O13 103.2(5) . . ?
O17 W2 O13 95.1(4) . . ?
O2 W2 O18 100.8(5) . . ?
O17 W2 O18 90.4(5) . . ?
O13 W2 O18 153.6(4) . . ?
O2 W2 O20 95.8(5) . . ?
O17 W2 O20 161.4(5) . . ?
O13 W2 O20 85.4(4) . . ?
O18 W2 O20 81.4(4) . . ?
O2 W2 O19 165.8(5) . . ?
O17 W2 O19 90.5(4) . . ?
O13 W2 O19 81.8(4) . . ?
O18 W2 O19 72.3(4) . . ?
O20 W2 O19 71.2(4) . . ?
O3 W3 O21 101.7(6) . . ?
O3 W3 O23 99.9(5) . . ?
O21 W3 O23 97.6(5) . . ?
O3 W3 O25 101.7(6) . . ?
O21 W3 O25 89.9(4) . . ?
O23 W3 O25 155.2(4) . . ?
O3 W3 O24 93.7(5) . . ?
O21 W3 O24 163.3(4) . . ?
O23 W3 O24 85.9(4) . . ?
O25 W3 O24 80.7(4) . . ?
O3 W3 O22 168.0(5) . . ?
O21 W3 O22 86.8(4) . . ?
O23 W3 O22 70.2(4) . . ?
O25 W3 O22 86.7(4) . . ?
O24 W3 O22 79.0(4) . . ?
O3 W3 K6 38.3(5) . 2_576 ?
O21 W3 K6 138.1(4) . 2_576 ?
O23 W3 K6 101.1(4) . 2_576 ?
O25 W3 K6 88.5(4) . 2_576 ?
O24 W3 K6 55.9(4) . 2_576 ?
O22 W3 K6 134.8(3) . 2_576 ?
O3 W3 K4 34.0(6) . . ?
O21 W3 K4 68.7(5) . . ?
O23 W3 K4 96.0(4) . . ?
O25 W3 K4 108.7(4) . . ?
O24 W3 K4 127.4(5) . . ?
O22 W3 K4 150.4(5) . . ?
K6 W3 K4 72.4(5) 2_576 . ?
O3 W3 K2 64.6(5) . . ?
O21 W3 K2 101.3(3) . . ?
O23 W3 K2 35.5(3) . . ?
O25 W3 K2 163.7(3) . . ?
O24 W3 K2 91.1(3) . . ?
O22 W3 K2 105.7(3) . . ?
K6 W3 K2 75.2(3) 2_576 . ?
K4 W3 K2 65.4(2) . . ?
O4 W4 O26 101.2(5) . . ?
O4 W4 O23 97.6(5) . . ?
O26 W4 O23 97.3(5) . . ?
O4 W4 O27 104.2(5) . . ?
O26 W4 O27 89.6(5) . . ?
O23 W4 O27 155.4(4) . . ?
O4 W4 O28 93.8(5) . . ?
O26 W4 O28 163.2(4) . . ?
O23 W4 O28 88.0(4) . . ?
O27 W4 O28 79.5(4) . . ?
O4 W4 O22 167.0(5) . . ?
O26 W4 O22 86.7(4) . . ?
O23 W4 O22 70.9(4) . . ?
O27 W4 O22 86.0(4) . . ?
O28 W4 O22 80.0(4) . . ?
O4 W4 K3 39.4(4) . . ?
O26 W4 K3 140.5(3) . . ?
O23 W4 K3 93.1(3) . . ?
O27 W4 K3 96.5(3) . . ?
O28 W4 K3 54.4(3) . . ?
O22 W4 K3 132.6(3) . . ?
O4 W4 K2 57.5(4) . . ?
O26 W4 K2 101.4(3) . . ?
O23 W4 K2 40.1(3) . . ?
O27 W4 K2 160.0(3) . . ?
O28 W4 K2 92.9(3) . . ?
O22 W4 K2 111.0(3) . . ?
K3 W4 K2 64.42(13) . . ?
O5 W5 O27 102.6(5) . . ?
O5 W5 O14 101.4(5) . . ?
O27 W5 O14 92.3(4) . . ?
O5 W5 O29 102.0(5) . . ?
O27 W5 O29 155.3(4) . . ?
O14 W5 O29 85.2(4) . . ?
O5 W5 O30 102.3(5) . . ?
O27 W5 O30 86.7(4) . . ?
O14 W5 O30 155.9(4) . . ?
O29 W5 O30 85.8(4) . . ?
O5 W5 O16 172.5(5) . . ?
O27 W5 O16 82.0(4) . . ?
O14 W5 O16 72.2(4) . . ?
O29 W5 O16 73.8(3) . . ?
O30 W5 O16 83.8(4) . . ?
O5 W5 K1 87.4(4) . 1_655 ?
O27 W5 K1 134.7(3) . 1_655 ?
O14 W5 K1 129.3(3) . 1_655 ?
O29 W5 K1 44.3(3) . 1_655 ?
O30 W5 K1 48.1(3) . 1_655 ?
O16 W5 K1 93.5(2) . 1_655 ?
O6 W6 O25 104.3(5) . . ?
O6 W6 O32 102.0(6) . . ?
O25 W6 O32 86.9(5) . . ?
O6 W6 O18 101.4(5) . . ?
O25 W6 O18 91.4(4) . . ?
O32 W6 O18 156.3(4) . . ?
O6 W6 O31 99.9(5) . . ?
O25 W6 O31 155.7(4) . . ?
O32 W6 O31 86.1(5) . . ?
O18 W6 O31 85.9(5) . . ?
O6 W6 O19 171.3(5) . . ?
O25 W6 O19 82.1(4) . . ?
O32 W6 O19 84.1(4) . . ?
O18 W6 O19 72.2(4) . . ?
O31 W6 O19 74.1(4) . . ?
O7 W7 O20 102.0(5) . . ?
O7 W7 O33 101.9(5) . . ?
O20 W7 O33 90.4(5) . . ?
O7 W7 O31 102.0(5) . . ?
O20 W7 O31 90.0(5) . . ?
O33 W7 O31 155.5(4) . . ?
O7 W7 O34 103.6(5) . . ?
O20 W7 O34 154.4(4) . . ?
O33 W7 O34 84.0(5) . . ?
O31 W7 O34 85.1(4) . . ?
O7 W7 O19 171.2(4) . . ?
O20 W7 O19 71.3(4) . . ?
O33 W7 O19 84.1(4) . . ?
O31 W7 O19 72.9(4) . . ?
O34 W7 O19 83.2(4) . . ?
O8 W8 O15 102.3(5) . . ?
O8 W8 O33 101.8(5) . . ?
O15 W8 O33 89.5(5) . . ?
O8 W8 O29 101.1(5) . . ?
O15 W8 O29 90.2(4) . . ?
O33 W8 O29 156.6(4) . . ?
O8 W8 O35 102.1(5) . . ?
O15 W8 O35 155.5(4) . . ?
O33 W8 O35 84.0(4) . . ?
O29 W8 O35 86.7(4) . . ?
O8 W8 O16 172.1(5) . . ?
O15 W8 O16 72.8(4) . . ?
O33 W8 O16 84.5(4) . . ?
O29 W8 O16 73.1(4) . . ?
O35 W8 O16 83.0(4) . . ?
O8 W8 K1 81.5(4) . 1_655 ?
O15 W8 K1 139.4(3) . 1_655 ?
O33 W8 K1 129.8(4) . 1_655 ?
O29 W8 K1 50.0(3) . 1_655 ?
O35 W8 K1 47.2(3) . 1_655 ?
O16 W8 K1 98.1(2) . 1_655 ?
O8 W8 K4 48.4(5) . 1_645 ?
O15 W8 K4 86.4(5) . 1_645 ?
O33 W8 K4 56.0(5) . 1_645 ?
O29 W8 K4 147.3(5) . 1_645 ?
O35 W8 K4 108.9(5) . 1_645 ?
O16 W8 K4 135.7(3) . 1_645 ?
K1 W8 K4 121.6(3) 1_655 1_645 ?
O8 W8 K7 64.3(5) . 1_655 ?
O15 W8 K7 38.5(4) . 1_655 ?
O33 W8 K7 102.2(4) . 1_655 ?
O29 W8 K7 92.0(4) . 1_655 ?
O35 W8 K7 165.8(4) . 1_655 ?
O16 W8 K7 110.1(3) . 1_655 ?
K1 W8 K7 122.9(3) 1_655 1_655 ?
K4 W8 K7 65.8(5) 1_645 1_655 ?
O9 W9 O35 101.1(5) . . ?
O9 W9 O34 102.2(5) . . ?
O35 W9 O34 86.8(4) . . ?
O9 W9 O37 100.7(5) . . ?
O35 W9 O37 158.2(4) . . ?
O34 W9 O37 89.6(4) . . ?
O9 W9 O38 100.6(5) . . ?
O35 W9 O38 87.3(4) . . ?
O34 W9 O38 157.1(4) . . ?
O37 W9 O38 87.7(4) . . ?
O9 W9 O36 171.9(5) . . ?
O35 W9 O36 84.4(4) . . ?
O34 W9 O36 83.9(4) . . ?
O37 W9 O36 73.9(4) . . ?
O38 W9 O36 73.5(4) . . ?
O9 W9 K1 80.5(4) . 1_655 ?
O35 W9 K1 46.7(3) . 1_655 ?
O34 W9 K1 132.1(3) . 1_655 ?
O37 W9 K1 137.5(3) . 1_655 ?
O38 W9 K1 51.0(3) . 1_655 ?
O36 W9 K1 99.4(2) . 1_655 ?
O10 W10 O24 103.0(5) . . ?
O10 W10 O32 102.0(5) . . ?
O24 W10 O32 89.3(5) . . ?
O10 W10 O39 100.1(5) . . ?
O24 W10 O39 90.6(4) . . ?
O32 W10 O39 157.3(4) . . ?
O10 W10 O37 101.5(5) . . ?
O24 W10 O37 155.4(4) . . ?
O32 W10 O37 85.3(4) . . ?
O39 W10 O37 85.4(4) . . ?
O10 W10 O36 172.0(4) . . ?
O24 W10 O36 82.9(4) . . ?
O32 W10 O36 83.2(4) . . ?
O39 W10 O36 74.3(4) . . ?
O37 W10 O36 72.6(4) . . ?
O10 W10 K6 50.7(5) . 2_576 ?
O24 W10 K6 52.9(4) . 2_576 ?
O32 W10 K6 93.5(4) . 2_576 ?
O39 W10 K6 104.5(4) . 2_576 ?
O37 W10 K6 151.3(4) . 2_576 ?
O36 W10 K6 135.7(3) . 2_576 ?
O11 W11 O28 103.0(5) . . ?
O11 W11 O30 101.0(5) . . ?
O28 W11 O30 88.7(4) . . ?
O11 W11 O39 100.1(5) . . ?
O28 W11 O39 90.8(4) . . ?
O30 W11 O39 158.4(4) . . ?
O11 W11 O38 102.6(5) . . ?
O28 W11 O38 154.3(4) . . ?
O30 W11 O38 85.3(4) . . ?
O39 W11 O38 85.9(4) . . ?
O11 W11 O36 171.5(5) . . ?
O28 W11 O36 82.6(4) . . ?
O30 W11 O36 85.3(4) . . ?
O39 W11 O36 73.2(4) . . ?
O38 W11 O36 72.0(4) . . ?
O11 W11 K3 52.5(4) . . ?
O28 W11 K3 50.7(3) . . ?
O30 W11 K3 101.0(3) . . ?
O39 W11 K3 95.4(3) . . ?
O38 W11 K3 155.0(3) . . ?
O36 W11 K3 132.2(2) . . ?
O11 W11 K1 88.0(4) . 1_655 ?
O28 W11 K1 135.4(3) . 1_655 ?
O30 W11 K1 46.7(3) . 1_655 ?
O39 W11 K1 130.1(3) . 1_655 ?
O38 W11 K1 44.6(3) . 1_655 ?
O36 W11 K1 92.3(2) . 1_655 ?
K3 W11 K1 126.26(12) . 1_655 ?
Mo1B Mo1A O41 165.8(17) . . ?
Mo1B Mo1A O26 80.8(14) . . ?
O41 Mo1A O26 93.0(6) . . ?
Mo1B Mo1A O12 73.6(14) . . ?
O41 Mo1A O12 93.0(6) . . ?
O26 Mo1A O12 81.0(5) . . ?
Mo1B Mo1A O40 4.7(13) . . ?
O41 Mo1A O40 163.8(7) . . ?
O26 Mo1A O40 76.1(4) . . ?
O12 Mo1A O40 73.7(4) . . ?
Mo1B Mo1A S1 87.5(14) . . ?
O41 Mo1A S1 104.9(6) . . ?
O26 Mo1A S1 86.5(4) . . ?
O12 Mo1A S1 158.7(4) . . ?
O40 Mo1A S1 86.6(3) . . ?
Mo1B Mo1A S2 81.8(14) . . ?
O41 Mo1A S2 101.5(5) . . ?
O26 Mo1A S2 159.6(4) . . ?
O12 Mo1A S2 84.0(4) . . ?
O40 Mo1A S2 86.6(3) . . ?
S1 Mo1A S2 103.3(3) . . ?
Mo1B Mo1A Mo2A 86.7(14) . 2_575 ?
O41 Mo1A Mo2A 106.3(6) . 2_575 ?
O26 Mo1A Mo2A 136.3(4) . 2_575 ?
O12 Mo1A Mo2A 134.7(4) . 2_575 ?
O40 Mo1A Mo2A 89.8(3) . 2_575 ?
S1 Mo1A Mo2A 51.11(19) . 2_575 ?
S2 Mo1A Mo2A 52.54(19) . 2_575 ?
Mo1B Mo1A Mo2B 76.2(14) . 2_575 ?
O41 Mo1A Mo2B 116.7(6) . 2_575 ?
O26 Mo1A Mo2B 132.7(4) . 2_575 ?
O12 Mo1A Mo2B 129.0(4) . 2_575 ?
O40 Mo1A Mo2B 79.4(3) . 2_575 ?
S1 Mo1A Mo2B 52.13(19) . 2_575 ?
S2 Mo1A Mo2B 51.50(19) . 2_575 ?
Mo2A Mo1A Mo2B 10.49(8) 2_575 2_575 ?
Mo2B Mo2A O42 166.1(13) . . ?
Mo2B Mo2A O21 74.8(11) . . ?
O42 Mo2A O21 92.3(6) . . ?
Mo2B Mo2A O17 78.7(11) . . ?
O42 Mo2A O17 94.2(6) . . ?
O21 Mo2A O17 80.6(4) . . ?
Mo2B Mo2A O40 5.0(10) . . ?
O42 Mo2A O40 164.7(6) . . ?
O21 Mo2A O40 76.2(4) . . ?
O17 Mo2A O40 74.2(4) . . ?
Mo2B Mo2A S1 89.3(11) . 2_575 ?
O42 Mo2A S1 102.2(5) . 2_575 ?
O21 Mo2A S1 160.4(4) . 2_575 ?
O17 Mo2A S1 85.3(4) . 2_575 ?
O40 Mo2A S1 87.0(3) . 2_575 ?
Mo2B Mo2A S2 80.6(11) . 2_575 ?
O42 Mo2A S2 104.0(5) . 2_575 ?
O21 Mo2A S2 85.4(3) . 2_575 ?
O17 Mo2A S2 157.4(3) . 2_575 ?
O40 Mo2A S2 85.4(3) . 2_575 ?
S1 Mo2A S2 103.5(2) 2_575 2_575 ?
Mo2B Mo2A Mo1A 87.1(11) . 2_575 ?
O42 Mo2A Mo1A 106.1(5) . 2_575 ?
O21 Mo2A Mo1A 136.2(4) . 2_575 ?
O17 Mo2A Mo1A 135.1(4) . 2_575 ?
O40 Mo2A Mo1A 89.2(3) . 2_575 ?
S1 Mo2A Mo1A 51.82(19) 2_575 2_575 ?
S2 Mo2A Mo1A 52.02(19) 2_575 2_575 ?
Mo2B Mo2A Mo1B 77.0(11) . 2_575 ?
O42 Mo2A Mo1B 116.3(5) . 2_575 ?
O21 Mo2A Mo1B 131.4(4) . 2_575 ?
O17 Mo2A Mo1B 130.7(4) . 2_575 ?
O40 Mo2A Mo1B 79.0(3) . 2_575 ?
S1 Mo2A Mo1B 52.42(19) 2_575 2_575 ?
S2 Mo2A Mo1B 51.35(19) 2_575 2_575 ?
Mo1A Mo2A Mo1B 10.16(10) 2_575 2_575 ?
Mo1A Mo1B O40 173.9(17) . . ?
Mo1A Mo1B O12 92.9(14) . . ?
O40 Mo1B O12 87.2(5) . . ?
Mo1A Mo1B O26 85.4(14) . . ?
O40 Mo1B O26 88.5(5) . . ?
O12 Mo1B O26 83.5(5) . . ?
Mo1A Mo1B O41 10.9(13) . . ?
O40 Mo1B O41 166.0(6) . . ?
O12 Mo1B O41 82.6(5) . . ?
O26 Mo1B O41 80.8(5) . . ?
Mo1A Mo1B S2 85.6(14) . . ?
O40 Mo1B S2 100.5(4) . . ?
O12 Mo1B S2 86.4(4) . . ?
O26 Mo1B S2 166.1(4) . . ?
O41 Mo1B S2 88.4(4) . . ?
Mo1A Mo1B S1 80.0(14) . . ?
O40 Mo1B S1 98.8(4) . . ?
O12 Mo1B S1 167.8(4) . . ?
O26 Mo1B S1 86.1(4) . . ?
O41 Mo1B S1 89.6(4) . . ?
S2 Mo1B S1 102.7(3) . . ?
Mo1A Mo1B Mo2B 93.6(14) . 2_575 ?
O40 Mo1B Mo2B 90.4(4) . 2_575 ?
O12 Mo1B Mo2B 137.9(4) . 2_575 ?
O26 Mo1B Mo2B 138.5(4) . 2_575 ?
O41 Mo1B Mo2B 103.7(5) . 2_575 ?
S2 Mo1B Mo2B 52.81(19) . 2_575 ?
S1 Mo1B Mo2B 53.11(19) . 2_575 ?
Mo1A Mo1B Mo2A 83.1(14) . 2_575 ?
O40 Mo1B Mo2A 100.8(4) . 2_575 ?
O12 Mo1B Mo2A 138.7(4) . 2_575 ?
O26 Mo1B Mo2A 136.6(4) . 2_575 ?
O41 Mo1B Mo2A 93.2(5) . 2_575 ?
S2 Mo1B Mo2A 52.4(2) . 2_575 ?
S1 Mo1B Mo2A 50.67(19) . 2_575 ?
Mo2B Mo1B Mo2A 10.52(8) 2_575 2_575 ?
Mo2A Mo2B O40 173.5(13) . . ?
Mo2A Mo2B O21 90.9(12) . . ?
O40 Mo2B O21 90.9(5) . . ?
Mo2A Mo2B O17 87.1(11) . . ?
O40 Mo2B O17 86.9(5) . . ?
O21 Mo2B O17 83.3(4) . . ?
Mo2A Mo2B O42 10.7(10) . . ?
O40 Mo2B O42 166.9(6) . . ?
O21 Mo2B O42 81.1(5) . . ?
O17 Mo2B O42 81.9(5) . . ?
Mo2A Mo2B S2 86.5(11) . 2_575 ?
O40 Mo2B S2 99.8(4) . 2_575 ?
O21 Mo2B S2 87.8(3) . 2_575 ?
O17 Mo2B S2 168.9(4) . 2_575 ?
O42 Mo2B S2 90.3(4) . 2_575 ?
Mo2A Mo2B S1 77.7(11) . 2_575 ?
O40 Mo2B S1 99.2(4) . 2_575 ?
O21 Mo2B S1 163.9(4) . 2_575 ?
O17 Mo2B S1 84.8(4) . 2_575 ?
O42 Mo2B S1 86.6(4) . 2_575 ?
S2 Mo2B S1 102.7(2) 2_575 2_575 ?
Mo2A Mo2B Mo1B 92.5(11) . 2_575 ?
O40 Mo2B Mo1B 90.1(4) . 2_575 ?
O21 Mo2B Mo1B 139.9(4) . 2_575 ?
O17 Mo2B Mo1B 136.8(4) . 2_575 ?
O42 Mo2B Mo1B 102.7(4) . 2_575 ?
S2 Mo2B Mo1B 52.62(19) 2_575 2_575 ?
S1 Mo2B Mo1B 53.21(19) 2_575 2_575 ?
Mo2A Mo2B Mo1A 82.4(11) . 2_575 ?
O40 Mo2B Mo1A 100.2(4) . 2_575 ?
O21 Mo2B Mo1A 139.3(4) . 2_575 ?
O17 Mo2B Mo1A 135.9(4) . 2_575 ?
O42 Mo2B Mo1A 92.6(4) . 2_575 ?
S2 Mo2B Mo1A 51.84(19) 2_575 2_575 ?
S1 Mo2B Mo1A 51.17(19) 2_575 2_575 ?
Mo1B Mo2B Mo1A 10.13(11) 2_575 2_575 ?
O16 P O22 111.0(6) . . ?
O16 P O36 108.2(5) . . ?
O22 P O36 111.0(5) . . ?
O16 P O19 109.6(5) . . ?
O22 P O19 109.5(5) . . ?
O36 P O19 107.4(5) . . ?
Mo2A S1 Mo1A 77.1(2) 2_575 . ?
Mo2A S1 Mo2B 12.99(10) 2_575 2_575 ?
Mo1A S1 Mo2B 76.7(2) . 2_575 ?
Mo2A S1 Mo1B 76.9(2) 2_575 . ?
Mo1A S1 Mo1B 12.52(12) . . ?
Mo2B S1 Mo1B 73.7(2) 2_575 . ?
Mo2A S1 K5 137.9(3) 2_575 1_565 ?
Mo1A S1 K5 143.3(3) . 1_565 ?
Mo2B S1 K5 140.0(3) 2_575 1_565 ?
Mo1B S1 K5 145.2(3) . 1_565 ?
Mo1B S2 Mo2B 74.6(2) . 2_575 ?
Mo1B S2 Mo1A 12.56(13) . . ?
Mo2B S2 Mo1A 76.7(2) 2_575 . ?
Mo1B S2 Mo2A 76.3(2) . 2_575 ?
Mo2B S2 Mo2A 12.92(10) 2_575 2_575 ?
Mo1A S2 Mo2A 75.4(2) . 2_575 ?
Mo1B S2 K7 120.6(4) . 2_565 ?
Mo2B S2 K7 137.6(3) 2_575 2_565 ?
Mo1A S2 K7 127.3(4) . 2_565 ?
Mo2A S2 K7 147.5(3) 2_575 2_565 ?
W1 O1 K7 118.4(7) . 2_565 ?
W2 O2 K5 149.2(7) . 2_565 ?
W2 O2 K5 128.9(7) . . ?
K5 O2 K5 81.9(4) 2_565 . ?
W3 O3 K6 119.0(7) . 2_576 ?
W3 O3 K4 126.2(9) . . ?
K6 O3 K4 114.8(7) 2_576 . ?
W4 O4 K3 117.3(5) . . ?
W4 O4 K2 96.6(5) . . ?
K3 O4 K2 85.4(4) . . ?
W6 O6 K1 151.7(6) . . ?
W7 O7 K3 150.8(7) . 1_545 ?
W8 O8 K2 152.3(6) . 1_645 ?
W8 O8 K4 106.9(6) . 1_645 ?
K2 O8 K4 99.6(5) 1_645 1_645 ?
W9 O9 K1 155.1(7) . 2_566 ?
W10 O10 K3 148.6(6) . 2_576 ?
W10 O10 K6 105.0(6) . 2_576 ?
K3 O10 K6 105.8(5) 2_576 2_576 ?
W11 O11 K6 145.3(7) . . ?
W11 O11 K3 102.8(5) . . ?
K6 O11 K3 102.6(5) . . ?
W1 O12 Mo1B 161.0(7) . . ?
W1 O12 Mo1A 151.4(7) . . ?
Mo1B O12 Mo1A 13.51(15) . . ?
W2 O13 W1 150.7(5) . . ?
W5 O14 W1 126.6(5) . . ?
W8 O15 W1 125.8(5) . . ?
W8 O15 K7 118.0(5) . 1_655 ?
W1 O15 K7 113.8(6) . 1_655 ?
P O16 W1 123.8(5) . . ?
P O16 W5 126.8(5) . . ?
W1 O16 W5 89.3(4) . . ?
P O16 W8 126.7(6) . . ?
W1 O16 W8 90.4(3) . . ?
W5 O16 W8 88.2(3) . . ?
W2 O17 Mo2B 163.1(6) . . ?
W2 O17 Mo2A 151.7(6) . . ?
Mo2B O17 Mo2A 14.20(13) . . ?
W6 O18 W2 125.4(5) . . ?
P O19 W2 125.7(6) . . ?
P O19 W6 126.6(5) . . ?
W2 O19 W6 89.8(3) . . ?
P O19 W7 125.1(5) . . ?
W2 O19 W7 90.5(3) . . ?
W6 O19 W7 87.4(3) . . ?
W7 O20 W2 126.9(5) . . ?
W3 O21 Mo2B 158.7(6) . . ?
W3 O21 Mo2A 154.0(6) . . ?
Mo2B O21 Mo2A 14.31(14) . . ?
P O22 W4 127.3(5) . . ?
P O22 W3 127.1(6) . . ?
W4 O22 W3 92.8(3) . . ?
W4 O23 W3 125.3(5) . . ?
W4 O23 K2 113.6(4) . . ?
W3 O23 K2 120.9(5) . . ?
W10 O24 W3 152.7(6) . . ?
W10 O24 K6 100.3(5) . 2_576 ?
W3 O24 K6 92.2(4) . 2_576 ?
W6 O25 W3 154.9(5) . . ?
W4 O26 Mo1B 157.2(6) . . ?
W4 O26 Mo1A 153.3(6) . . ?
Mo1B O26 Mo1A 13.80(15) . . ?
W5 O27 W4 155.8(6) . . ?
W11 O28 W4 154.3(6) . . ?
W11 O28 K3 102.8(4) . . ?
W4 O28 K3 94.4(3) . . ?
W8 O29 W5 124.6(5) . . ?
W8 O29 K1 100.6(4) . 1_655 ?
W5 O29 K1 109.0(4) . 1_655 ?
W11 O30 W5 146.2(5) . . ?
W11 O30 K1 107.2(4) . 1_655 ?
W5 O30 K1 104.4(4) . 1_655 ?
W7 O31 W6 125.3(6) . . ?
W6 O32 W10 147.4(7) . . ?
W7 O33 W8 154.4(6) . . ?
W7 O33 K4 107.6(6) . 1_645 ?
W8 O33 K4 94.8(5) . 1_645 ?
W9 O34 W7 150.8(6) . . ?
W9 O35 W8 150.4(5) . . ?
W9 O35 K1 105.4(4) . 1_655 ?
W8 O35 K1 103.1(4) . 1_655 ?
P O36 W9 128.8(5) . . ?
P O36 W10 124.7(5) . . ?
W9 O36 W10 90.8(3) . . ?
P O36 W11 122.1(5) . . ?
W9 O36 W11 90.1(3) . . ?
W10 O36 W11 89.0(3) . . ?
W9 O37 W10 122.6(5) . . ?
W9 O38 W11 124.3(5) . . ?
W9 O38 K1 99.3(4) . 1_655 ?
W11 O38 K1 108.6(4) . 1_655 ?
W11 O39 W10 123.5(5) . . ?
Mo2B O40 Mo1B 179.2(7) . . ?
Mo2B O40 Mo1A 179.4(7) . . ?
Mo1B O40 Mo1A 1.4(4) . . ?
Mo2B O40 Mo2A 1.5(3) . . ?
Mo1B O40 Mo2A 177.9(7) . . ?
Mo1A O40 Mo2A 178.5(6) . . ?
Mo1A O41 Mo1B 3.2(4) . . ?
Mo2A O42 Mo2B 3.3(3) . . ?
O6 K1 O9 122.1(4) . 2_566 ?
O6 K1 O14W 76.8(15) . 2_576 ?
O9 K1 O14W 73.9(13) 2_566 2_576 ?
O6 K1 O35 125.3(4) . 1_455 ?
O9 K1 O35 112.6(4) 2_566 1_455 ?
O14W K1 O35 124.0(13) 2_576 1_455 ?
O6 K1 O3W 131.1(5) . 1_545 ?
O9 K1 O3W 68.4(5) 2_566 1_545 ?
O14W K1 O3W 141.4(14) 2_576 1_545 ?
O35 K1 O3W 66.4(4) 1_455 1_545 ?
O6 K1 O29 71.9(3) . 1_455 ?
O9 K1 O29 163.5(4) 2_566 1_455 ?
O14W K1 O29 120.3(13) 2_576 1_455 ?
O35 K1 O29 53.6(3) 1_455 1_455 ?
O3W K1 O29 96.1(5) 1_545 1_455 ?
O6 K1 O38 125.6(4) . 1_455 ?
O9 K1 O38 90.8(3) 2_566 1_455 ?
O14W K1 O38 72.6(14) 2_576 1_455 ?
O35 K1 O38 52.4(3) 1_455 1_455 ?
O3W K1 O38 99.6(5) 1_545 1_455 ?
O29 K1 O38 86.4(3) 1_455 1_455 ?
O6 K1 O30 79.2(3) . 1_455 ?
O9 K1 O30 135.4(4) 2_566 1_455 ?
O14W K1 O30 74.4(13) 2_576 1_455 ?
O35 K1 O30 63.5(3) 1_455 1_455 ?
O3W K1 O30 129.8(4) 1_545 1_455 ?
O29 K1 O30 50.9(3) 1_455 1_455 ?
O38 K1 O30 49.9(3) 1_455 1_455 ?
O6 K1 W9 142.7(3) . 1_455 ?
O9 K1 W9 91.9(3) 2_566 1_455 ?
O14W K1 W9 101.4(14) 2_576 1_455 ?
O35 K1 W9 27.9(2) 1_455 1_455 ?
O3W K1 W9 72.5(4) 1_545 1_455 ?
O29 K1 W9 77.6(2) 1_455 1_455 ?
O38 K1 W9 29.70(19) 1_455 1_455 ?
O30 K1 W9 64.8(2) 1_455 1_455 ?
O6 K1 W8 99.5(3) . 1_455 ?
O9 K1 W8 134.2(3) 2_566 1_455 ?
O14W K1 W8 139.4(13) 2_576 1_455 ?
O35 K1 W8 29.7(2) 1_455 1_455 ?
O3W K1 W8 70.1(4) 1_545 1_455 ?
O29 K1 W8 29.41(19) 1_455 1_455 ?
O38 K1 W8 77.9(2) 1_455 1_455 ?
O30 K1 W8 65.4(2) 1_455 1_455 ?
W9 K1 W8 57.45(7) 1_455 1_455 ?
O6 K1 W5 64.3(3) . 1_455 ?
O9 K1 W5 163.0(3) 2_566 1_455 ?
O14W K1 W5 93.8(13) 2_576 1_455 ?
O35 K1 W5 64.3(2) 1_455 1_455 ?
O3W K1 W5 121.0(4) 1_545 1_455 ?
O29 K1 W5 26.66(19) 1_455 1_455 ?
O38 K1 W5 74.1(2) 1_455 1_455 ?
O30 K1 W5 27.6(2) 1_455 1_455 ?
W9 K1 W5 78.77(9) 1_455 1_455 ?
W8 K1 W5 50.97(6) 1_455 1_455 ?
O6 K1 W11 98.9(3) . 1_455 ?
O9 K1 W11 109.8(3) 2_566 1_455 ?
O14W K1 W11 62.7(13) 2_576 1_455 ?
O35 K1 W11 63.3(2) 1_455 1_455 ?
O3W K1 W11 123.6(4) 1_545 1_455 ?
O29 K1 W11 73.6(2) 1_455 1_455 ?
O38 K1 W11 26.83(19) 1_455 1_455 ?
O30 K1 W11 26.1(2) 1_455 1_455 ?
W9 K1 W11 51.09(7) 1_455 1_455 ?
W8 K1 W11 78.46(9) 1_455 1_455 ?
W5 K1 W11 53.34(7) 1_455 1_455 ?
O8 K2 O23 118.5(4) 1_465 . ?
O8 K2 O1W 137.1(5) 1_465 . ?
O23 K2 O1W 65.0(4) . . ?
O8 K2 O2W 69.5(5) 1_465 . ?
O23 K2 O2W 65.3(4) . . ?
O1W K2 O2W 130.3(5) . . ?
O8 K2 O3W 68.4(5) 1_465 . ?
O23 K2 O3W 125.6(5) . . ?
O1W K2 O3W 76.3(6) . . ?
O2W K2 O3W 135.3(6) . . ?
O8 K2 O8W 116.7(6) 1_465 . ?
O23 K2 O8W 124.3(6) . . ?
O1W K2 O8W 70.7(7) . . ?
O2W K2 O8W 145.0(8) . . ?
O3W K2 O8W 70.6(7) . . ?
O8 K2 O13W 65.8(7) 1_465 1_565 ?
O23 K2 O13W 127.8(7) . 1_565 ?
O1W K2 O13W 150.0(7) . 1_565 ?
O2W K2 O13W 70.0(7) . 1_565 ?
O3W K2 O13W 105.0(7) . 1_565 ?
O8W K2 O13W 81.3(8) . 1_565 ?
O8 K2 O4 143.9(4) 1_465 . ?
O23 K2 O4 52.1(3) . . ?
O1W K2 O4 75.1(4) . . ?
O2W K2 O4 76.2(4) . . ?
O3W K2 O4 147.5(5) . . ?
O8W K2 O4 85.6(6) . . ?
O13W K2 O4 92.5(7) 1_565 . ?
O8 K2 W4 135.0(3) 1_465 . ?
O23 K2 W4 26.3(2) . . ?
O1W K2 W4 68.8(4) . . ?
O2W K2 W4 67.7(4) . . ?
O3W K2 W4 143.5(4) . . ?
O8W K2 W4 106.3(6) . . ?
O13W K2 W4 110.6(7) 1_565 . ?
O4 K2 W4 25.91(16) . . ?
O8 K2 W3 99.4(3) 1_465 . ?
O23 K2 W3 23.7(2) . . ?
O1W K2 W3 68.2(3) . . ?
O2W K2 W3 65.9(4) . . ?
O3W K2 W3 107.2(4) . . ?
O8W K2 W3 138.0(6) . . ?
O13W K2 W3 135.9(6) 1_565 . ?
O4 K2 W3 75.80(18) . . ?
W4 K2 W3 49.90(6) . . ?
O8 K2 K3 165.0(3) 1_465 . ?
O23 K2 K3 76.1(2) . . ?
O1W K2 K3 49.8(4) . . ?
O2W K2 K3 117.7(4) . . ?
O3W K2 K3 106.8(4) . . ?
O8W K2 K3 49.4(6) . . ?
O13W K2 K3 103.3(6) 1_565 . ?
O4 K2 K3 41.6(2) . . ?
W4 K2 K3 57.23(10) . . ?
W3 K2 K3 95.57(12) . . ?
O8 K2 K1 62.5(3) 1_465 1_565 ?
O23 K2 K1 167.0(4) . 1_565 ?
O1W K2 K1 104.9(4) . 1_565 ?
O2W K2 K1 123.9(4) . 1_565 ?
O3W K2 K1 41.6(4) . 1_565 ?
O8W K2 K1 54.7(6) . 1_565 ?
O13W K2 K1 65.1(6) 1_565 1_565 ?
O4 K2 K1 135.6(3) . 1_565 ?
W4 K2 K1 160.34(18) . 1_565 ?
W3 K2 K1 146.8(2) . 1_565 ?
K3 K2 K1 104.06(15) . 1_565 ?
O6W K3 O10 132.7(13) 2_676 2_576 ?
O6W K3 O10W 99.0(14) 2_676 . ?
O10 K3 O10W 67.4(10) 2_576 . ?
O6W K3 O9W 17.8(19) 2_676 2_676 ?
O10 K3 O9W 115.4(18) 2_576 2_676 ?
O10W K3 O9W 96.2(18) . 2_676 ?
O6W K3 O4 70.1(12) 2_676 . ?
O10 K3 O4 145.6(4) 2_576 . ?
O10W K3 O4 142.8(9) . . ?
O9W K3 O4 82.9(17) 2_676 . ?
O6W K3 O7 73.8(12) 2_676 1_565 ?
O10 K3 O7 129.9(4) 2_576 1_565 ?
O10W K3 O7 66.7(9) . 1_565 ?
O9W K3 O7 88.5(18) 2_676 1_565 ?
O4 K3 O7 76.2(3) . 1_565 ?
O6W K3 O28 78.6(11) 2_676 . ?
O10 K3 O28 100.1(3) 2_576 . ?
O10W K3 O28 160.8(9) . . ?
O9W K3 O28 75.6(16) 2_676 . ?
O4 K3 O28 54.4(3) . . ?
O7 K3 O28 129.2(3) 1_565 . ?
O6W K3 O8W 144.5(14) 2_676 . ?
O10 K3 O8W 78.8(6) 2_576 . ?
O10W K3 O8W 76.7(10) . . ?
O9W K3 O8W 160.6(18) 2_676 . ?
O4 K3 O8W 92.0(6) . . ?
O7 K3 O8W 72.1(6) 1_565 . ?
O28 K3 O8W 116.4(6) . . ?
O6W K3 O1W 136.1(11) 2_676 . ?
O10 K3 O1W 68.1(4) 2_576 . ?
O10W K3 O1W 124.3(10) . . ?
O9W K3 O1W 132.8(16) 2_676 . ?
O4 K3 O1W 78.2(4) . . ?
O7 K3 O1W 127.0(4) 1_565 . ?
O28 K3 O1W 58.2(4) . . ?
O8W K3 O1W 63.3(6) . . ?
O6W K3 O11 77.3(13) 2_676 . ?
O10 K3 O11 66.9(4) 2_576 . ?
O10W K3 O11 109.7(9) . . ?
O9W K3 O11 61.5(18) 2_676 . ?
O4 K3 O11 102.4(3) . . ?
O7 K3 O11 149.7(4) 1_565 . ?
O28 K3 O11 51.1(3) . . ?
O8W K3 O11 137.8(6) . . ?
O1W K3 O11 81.0(4) . . ?
O6W K3 W4 72.6(11) 2_676 . ?
O10 K3 W4 127.1(3) 2_576 . ?
O10W K3 W4 165.4(9) . . ?
O9W K3 W4 79.4(16) 2_676 . ?
O4 K3 W4 23.3(2) . . ?
O7 K3 W4 99.1(3) 1_565 . ?
O28 K3 W4 31.16(18) . . ?
O8W K3 W4 103.0(5) . . ?
O1W K3 W4 66.5(3) . . ?
O11 K3 W4 80.6(2) . . ?
O6W K3 W11 77.8(12) 2_676 . ?
O10 K3 W11 81.5(3) 2_576 . ?
O10W K3 W11 134.3(9) . . ?
O9W K3 W11 67.2(17) 2_676 . ?
O4 K3 W11 79.6(2) . . ?
O7 K3 W11 147.5(3) 1_565 . ?
O28 K3 W11 26.52(18) . . ?
O8W K3 W11 130.3(5) . . ?
O1W K3 W11 67.1(3) . . ?
O11 K3 W11 24.68(18) . . ?
W4 K3 W11 56.81(7) . . ?
O7W K4 O3 80.1(12) . . ?
O7W K4 O5W 112.5(16) . . ?
O3 K4 O5W 66.6(7) . . ?
O7W K4 O8 171.7(13) . 1_465 ?
O3 K4 O8 92.5(6) . 1_465 ?
O5W K4 O8 67.1(6) . 1_465 ?
O7W K4 O4W 94.7(13) . 2_576 ?
O3 K4 O4W 162.3(11) . 2_576 ?
O5W K4 O4W 130.5(8) . 2_576 ?
O8 K4 O4W 91.3(7) 1_465 2_576 ?
O7W K4 O6W 45.5(16) . 2_576 ?
O3 K4 O6W 72.5(12) . 2_576 ?
O5W K4 O6W 68.5(13) . 2_576 ?
O8 K4 O6W 135.5(13) 1_465 2_576 ?
O4W K4 O6W 115.7(12) 2_576 2_576 ?
O7W K4 O33 135.2(14) . 1_465 ?
O3 K4 O33 130.5(8) . 1_465 ?
O5W K4 O33 67.4(6) . 1_465 ?
O8 K4 O33 52.8(3) 1_465 1_465 ?
O4W K4 O33 64.3(5) 2_576 1_465 ?
O6W K4 O33 106.2(12) 2_576 1_465 ?
O7W K4 W8 163.6(13) . 1_465 ?
O3 K4 W8 114.6(5) . 1_465 ?
O5W K4 W8 69.9(6) . 1_465 ?
O8 K4 W8 24.7(2) 1_465 1_465 ?
O4W K4 W8 73.4(5) 2_576 1_465 ?
O6W K4 W8 129.4(12) 2_576 1_465 ?
O33 K4 W8 29.2(2) 1_465 1_465 ?
O7W K4 W3 76.3(11) . . ?
O3 K4 W3 19.8(3) . . ?
O5W K4 W3 85.6(6) . . ?
O8 K4 W3 95.5(5) 1_465 . ?
O4W K4 W3 142.6(9) 2_576 . ?
O6W K4 W3 83.9(11) 2_576 . ?
O33 K4 W3 143.9(5) 1_465 . ?
W8 K4 W3 120.0(4) 1_465 . ?
O7W K4 K7 122.9(15) . 1_565 ?
O3 K4 K7 113.9(8) . 1_565 ?
O5W K4 K7 124.0(7) . 1_565 ?
O8 K4 K7 56.9(5) 1_465 1_565 ?
O4W K4 K7 55.1(6) 2_576 1_565 ?
O6W K4 K7 167.1(12) 2_576 1_565 ?
O33 K4 K7 78.6(5) 1_465 1_565 ?
W8 K4 K7 59.5(4) 1_465 1_565 ?
W3 K4 K7 99.3(6) . 1_565 ?
O7W K4 K2 134.0(12) . . ?
O3 K4 K2 56.6(4) . . ?
O5W K4 K2 66.5(6) . . ?
O8 K4 K2 37.8(3) 1_465 . ?
O4W K4 K2 121.5(8) 2_576 . ?
O6W K4 K2 121.6(12) 2_576 . ?
O33 K4 K2 88.8(4) 1_465 . ?
W8 K4 K2 62.3(3) 1_465 . ?
W3 K4 K2 57.7(2) . . ?
K7 K4 K2 69.8(4) 1_565 . ?
O7W K4 K6 87.7(13) . 2_576 ?
O3 K4 K6 32.1(5) . 2_576 ?
O5W K4 K6 36.9(6) . 2_576 ?
O8 K4 K6 87.9(5) 1_465 2_576 ?
O4W K4 K6 165.5(9) 2_576 2_576 ?
O6W K4 K6 57.0(11) 2_576 2_576 ?
O33 K4 K6 104.3(6) 1_465 2_576 ?
W8 K4 K6 101.1(5) 1_465 2_576 ?
W3 K4 K6 51.9(3) . 2_576 ?
K7 K4 K6 134.2(5) 1_565 2_576 ?
K2 K4 K6 64.6(4) . 2_576 ?
O16W K5 O16W 89.0(11) . 2_565 ?
O16W K5 O2 60.8(8) . 2_565 ?
O16W K5 O2 66.4(8) 2_565 2_565 ?
O16W K5 O13W 102.1(10) . . ?
O16W K5 O13W 129.4(10) 2_565 . ?
O2 K5 O13W 158.8(8) 2_565 . ?
O16W K5 K7 83.1(9) . . ?
O16W K5 K7 148.0(8) 2_565 . ?
O2 K5 K7 82.8(5) 2_565 . ?
O13W K5 K7 82.6(8) . . ?
O16W K5 O12W 141.7(10) . . ?
O16W K5 O12W 63.7(9) 2_565 . ?
O2 K5 O12W 122.1(7) 2_565 . ?
O13W K5 O12W 79.1(9) . . ?
K7 K5 O12W 134.2(8) . . ?
O16W K5 O2 64.5(8) . . ?
O16W K5 O2 56.7(7) 2_565 . ?
O2 K5 O2 98.1(4) 2_565 . ?
O13W K5 O2 83.9(7) . . ?
K7 K5 O2 141.2(5) . . ?
O12W K5 O2 77.8(6) . . ?
O16W K5 O2W 136.0(9) . 1_545 ?
O16W K5 O2W 131.7(8) 2_565 1_545 ?
O2 K5 O2W 114.8(5) 2_565 1_545 ?
O13W K5 O2W 67.4(8) . 1_545 ?
K7 K5 O2W 53.8(5) . 1_545 ?
O12W K5 O2W 80.4(7) . 1_545 ?
O2 K5 O2W 146.7(5) . 1_545 ?
O16W K5 S1 127.9(8) . 1_545 ?
O16W K5 S1 74.9(7) 2_565 1_545 ?
O2 K5 S1 67.4(3) 2_565 1_545 ?
O13W K5 S1 126.5(7) . 1_545 ?
K7 K5 S1 85.6(4) . 1_545 ?
O12W K5 S1 72.8(5) . 1_545 ?
O2 K5 S1 130.7(5) . 1_545 ?
O2W K5 S1 63.7(4) 1_545 1_545 ?
O16W K5 O15W 39.6(13) . 2_565 ?
O16W K5 O15W 110.9(13) 2_565 2_565 ?
O2 K5 O15W 100.0(11) 2_565 2_565 ?
O13W K5 O15W 62.7(13) . 2_565 ?
K7 K5 O15W 81.9(11) . 2_565 ?
O12W K5 O15W 123.9(12) . 2_565 ?
O2 K5 O15W 59.6(11) . 2_565 ?
O2W K5 O15W 115.9(12) 1_545 2_565 ?
S1 K5 O15W 163.3(11) 1_545 2_565 ?
O16W K5 K5 45.7(8) . 2_565 ?
O16W K5 K5 43.3(7) 2_565 2_565 ?
O2 K5 K5 51.6(3) 2_565 2_565 ?
O13W K5 K5 126.8(7) . 2_565 ?
K7 K5 K5 121.6(6) . 2_565 ?
O12W K5 K5 102.8(7) . 2_565 ?
O2 K5 K5 46.5(3) . 2_565 ?
O2W K5 K5 165.7(5) 1_545 2_565 ?
S1 K5 K5 103.6(4) 1_545 2_565 ?
O15W K5 K5 74.1(12) 2_565 2_565 ?
O16W K5 K2 134.7(9) . 1_545 ?
O16W K5 K2 129.5(8) 2_565 1_545 ?
O2 K5 K2 148.6(4) 2_565 1_545 ?
O13W K5 K2 37.3(7) . 1_545 ?
K7 K5 K2 74.3(5) . 1_545 ?
O12W K5 K2 65.7(6) . 1_545 ?
O2 K5 K2 113.2(3) . 1_545 ?
O2W K5 K2 33.8(3) 1_545 1_545 ?
S1 K5 K2 89.4(2) 1_545 1_545 ?
O15W K5 K2 97.8(12) 2_565 1_545 ?
K5 K5 K2 159.7(4) 2_565 1_545 ?
O11 K6 O3 146.8(9) . 2_576 ?
O11 K6 O5W 112.3(8) . 2_576 ?
O3 K6 O5W 67.1(7) 2_576 2_576 ?
O11 K6 O14W 57.4(12) . 2_676 ?
O3 K6 O14W 132.2(14) 2_576 2_676 ?
O5W K6 O14W 65.1(13) 2_576 2_676 ?
O11 K6 O10 68.1(5) . 2_576 ?
O3 K6 O10 104.2(6) 2_576 2_576 ?
O5W K6 O10 165.5(10) 2_576 2_576 ?
O14W K6 O10 121.9(13) 2_676 2_576 ?
O11 K6 O24 105.3(6) . 2_576 ?
O3 K6 O24 54.4(4) 2_576 2_576 ?
O5W K6 O24 117.3(8) 2_576 2_576 ?
O14W K6 O24 158.3(14) 2_676 2_576 ?
O10 K6 O24 51.0(4) 2_576 2_576 ?
O11 K6 W3 133.6(7) . 2_576 ?
O3 K6 W3 22.7(3) 2_576 2_576 ?
O5W K6 W3 88.9(7) 2_576 2_576 ?
O14W K6 W3 152.7(14) 2_676 2_576 ?
O10 K6 W3 81.6(4) 2_576 2_576 ?
O24 K6 W3 32.0(2) 2_576 2_576 ?
O11 K6 W10 87.1(5) . 2_576 ?
O3 K6 W10 80.0(5) 2_576 2_576 ?
O5W K6 W10 143.9(8) 2_576 2_576 ?
O14W K6 W10 144.1(13) 2_676 2_576 ?
O10 K6 W10 24.3(3) 2_576 2_576 ?
O24 K6 W10 26.8(2) 2_576 2_576 ?
W3 K6 W10 57.3(2) 2_576 2_576 ?
O11 K6 K4 145.5(7) . 2_576 ?
O3 K6 K4 33.1(4) 2_576 2_576 ?
O5W K6 K4 36.5(6) 2_576 2_576 ?
O14W K6 K4 100.7(13) 2_676 2_576 ?
O10 K6 K4 137.0(6) 2_576 2_576 ?
O24 K6 K4 87.3(5) 2_576 2_576 ?
W3 K6 K4 55.8(3) 2_576 2_576 ?
W10 K6 K4 113.0(4) 2_576 2_576 ?
O11 K6 K3 42.7(3) . . ?
O3 K6 K3 137.9(6) 2_576 . ?
O5W K6 K3 153.2(7) 2_576 . ?
O14W K6 K3 88.9(12) 2_676 . ?
O10 K6 K3 33.7(3) 2_576 . ?
O24 K6 K3 84.2(4) 2_576 . ?
W3 K6 K3 115.3(4) 2_576 . ?
W10 K6 K3 58.0(2) 2_576 . ?
K4 K6 K3 170.2(5) 2_576 . ?
O11 K6 K6 78.2(5) . 2_676 ?
O3 K6 K6 135.0(8) 2_576 2_676 ?
O5W K6 K6 104.6(8) 2_576 2_676 ?
O14W K6 K6 62.2(13) 2_676 2_676 ?
O10 K6 K6 89.8(6) 2_576 2_676 ?
O24 K6 K6 131.5(7) 2_576 2_676 ?
W3 K6 K6 137.7(6) 2_576 2_676 ?
W10 K6 K6 109.1(5) 2_576 2_676 ?
K4 K6 K6 117.3(6) 2_576 2_676 ?
K3 K6 K6 65.8(3) . 2_676 ?
O11 K6 K2 100.5(6) . 2_576 ?
O3 K6 K2 49.1(4) 2_576 2_576 ?
O5W K6 K2 59.2(6) 2_576 2_576 ?
O14W K6 K2 102.0(13) 2_676 2_576 ?
O10 K6 K2 106.3(5) 2_576 2_576 ?
O24 K6 K2 66.1(4) 2_576 2_576 ?
W3 K6 K2 54.6(3) 2_576 2_576 ?
W10 K6 K2 88.4(4) 2_576 2_576 ?
K4 K6 K2 55.0(3) 2_576 2_576 ?
K3 K6 K2 124.9(4) . 2_576 ?
K6 K6 K2 162.3(6) 2_676 2_576 ?
O2W K7 O15 104.6(8) 1_545 1_455 ?
O2W K7 K5 70.1(6) 1_545 . ?
O15 K7 K5 117.7(6) 1_455 . ?
O2W K7 O1 122.3(8) 1_545 2_565 ?
O15 K7 O1 97.7(6) 1_455 2_565 ?
K5 K7 O1 139.1(8) . 2_565 ?
O2W K7 S2 62.4(5) 1_545 2_565 ?
O15 K7 S2 119.2(7) 1_455 2_565 ?
K5 K7 S2 112.0(5) . 2_565 ?
O1 K7 S2 60.3(4) 2_565 2_565 ?
O2W K7 W8 81.2(6) 1_545 1_455 ?
O15 K7 W8 23.6(3) 1_455 1_455 ?
K5 K7 W8 107.0(5) . 1_455 ?
O1 K7 W8 113.3(6) 2_565 1_455 ?
S2 K7 W8 110.2(5) 2_565 1_455 ?
O2W K7 W1 120.4(6) 1_545 2_565 ?
O15 K7 W1 117.0(5) 1_455 2_565 ?
K5 K7 W1 117.8(6) . 2_565 ?
O1 K7 W1 21.3(3) 2_565 2_565 ?
S2 K7 W1 60.7(2) 2_565 2_565 ?
W8 K7 W1 134.4(5) 1_455 2_565 ?
O2W K7 W1 130.9(7) 1_545 1_455 ?
O15 K7 W1 26.8(3) 1_455 1_455 ?
K5 K7 W1 116.9(5) . 1_455 ?
O1 K7 W1 85.4(4) 2_565 1_455 ?
S2 K7 W1 130.7(5) 2_565 1_455 ?
W8 K7 W1 49.8(2) 1_455 1_455 ?
W1 K7 W1 99.6(3) 2_565 1_455 ?
O2W K7 K4 57.4(6) 1_545 1_545 ?
O15 K7 K4 67.6(5) 1_455 1_545 ?
K5 K7 K4 125.6(6) . 1_545 ?
O1 K7 K4 85.2(6) 2_565 1_545 ?
S2 K7 K4 55.6(4) 2_565 1_545 ?
W8 K7 K4 54.6(3) 1_455 1_545 ?
W1 K7 K4 101.0(5) 2_565 1_545 ?
W1 K7 K4 90.0(4) 1_455 1_545 ?
O2W K7 K2 28.5(4) 1_545 1_545 ?
O15 K7 K2 79.0(4) 1_455 1_545 ?
K5 K7 K2 71.6(4) . 1_545 ?
O1 K7 K2 139.4(7) 2_565 1_545 ?
S2 K7 K2 85.9(4) 2_565 1_545 ?
W8 K7 K2 55.5(2) 1_455 1_545 ?
W1 K7 K2 146.5(5) 2_565 1_545 ?
W1 K7 K2 103.8(4) 1_455 1_545 ?
K4 K7 K2 55.9(3) 1_545 1_545 ?
K2 O1W K3 87.9(5) . . ?
K7 O2W K2 123.2(7) 1_565 . ?
K7 O2W K5 56.2(6) 1_565 1_565 ?
K2 O2W K5 106.2(6) . 1_565 ?
K2 O3W K1 98.2(6) . 1_565 ?
K4 O5W K6 106.6(9) . 2_576 ?
O9W O6W K3 86(8) . 2_676 ?
O9W O6W K4 128(8) . 2_576 ?
K3 O6W K4 120.0(18) 2_676 2_576 ?
K2 O8W K3 85.6(7) . . ?
O6W O9W K3 76(8) . 2_676 ?
K5 O13W K2 108.9(10) . 1_545 ?
K1 O14W K6 142(2) 2_576 2_676 ?
K5 O16W K5 91.0(11) . 2_565 ?

_diffrn_measured_fraction_theta_max    0.978
_diffrn_reflns_theta_full              28.00
_diffrn_measured_fraction_theta_full   0.978
_refine_diff_density_max    4.224
_refine_diff_density_min   -2.349
_refine_diff_density_rms    0.496

#===END
